# Supplementary material for: Rescuing eGFP-Tagged Canine Distemper Virus for 40 Serial Passages Separately in Ribavirin- and Non-Treated Cells: Comparative Analysis of Viral Mutation Profiles
Source: Front Cell Infect Microbiol. 2021 Sep 16;11:746926. doi: 10.3389/fcimb.2021.746926 (PMC8481889; doi:10.3389/fcimb.2021.746926)
Supplement: Supplementary file 1 [file Table_1.xlsx]

## Sheet: Sheet1
Supplementary 1 Distribution of SNMs in rCDV-eGFP-R antigenome at P47
Position (nt)	Wild-type	Mutation	Sequencing depth (X)	Mutation frequency
320	G	A	A:37 G:136	0.2139	N ORF
380	C	T	T:22 C:159	0.1215
497	C	T	T:156 C:0	1
1370	C	T	T:233 C:0	1
2237	G	A	A:346 G:0	1	P ORF
2275	T	C	C:456 T:3	0.9935
2321	T	A	A:521 T:0	1
2883	C	T	T:31 C:189	0.1409
3881	A	G	G:12 A:149	0.0745	eGFP ORF
3943	G	A	A:10 G:167	0.0565
4258	C	T	T:57 C:0	1	UTR
4334	C	T	T:145 C:0	1	M ORF
4348	C	T	T:105 C:30	0.7778
4506	C	T	T:169 C:0	1
5425	C	T	T:36 C:141	0.2034	UTR
5716	C	T	T:128 C:0	1
5766	G	A	A:84 G:0	1
5883	G	A	A:11 G:46	0.193	F ORF
7131	G	A	A:162 G:0	1
7392	G	A	A:61 G:70	0.4656
7633	C	T	T:72 C:76	0.4865
7888	G	A	A:111 G:0	1	UTR
8279	C	T	T:153 C:0	1	H ORF
8629	G	A	A:33 G:229	0.126
8990	G	A	A:48 G:94	0.338
9679	C	A	A:12 C:212	0.0536
10133	G	A	A:18 G:110	0.1406	L ORF
10643	C	T	T:129 C:0	1
11111	C	T	T:12 C:201	0.0563
11168	C	T	T:55 C:175	0.2391
11225	C	T	T:10 C:113	0.0813
11588	C	T	T:34 C:126	0.2125
12125	C	T	T:72 C:0	1
12275	C	T	T:66 C:54	0.55
12515	G	A	A:19 G:71	0.2111
12893	C	T	T:15 C:129	0.1042
12977	C	T	T:13 C:129	0.0915
13895	C	T	T:37 C:58	0.3895
14132	G	A	A:22 G:75	0.2268
14546	C	T	T:126 C:0	1
15883	C	T	T:20 C:158	0.1124
16126	A	G	G:92 A:433	0.1752
16136	A	G	G:127 A:1268	0.091
16152	A	G	G:167 A:1592	0.0949
16159	T	C	C:228 T:1908	0.1067
16163	A	G	G:213 A:2053	0.094
16193	T	C	C:290 T:2674	0.0978
16195	T	C	C:182 T:2831	0.0604
16215	T	C	C:179 T:3069	0.0551
16226	T	C	C:195 T:3058	0.0599
16246	T	C	C:221 T:2943	0.0698
16267	T	C	C:178 T:2662	0.0627
16295	T	C	C:110 T:2023	0.0516
16312	A	G	G:162 A:1397	0.1039
16342	A	G	G:65 A:757	0.079
16343	A	G	G:65 A:757	0.079
16344	A	G	G:65 A:757	0.079
16345	A	G	G:65 A:757	0.079
16348	A	G	G:65 A:757	0.079
16378	T	C	C:145 T:908	0.1377
16386	T	C	C:80 T:959	0.077
16417	T	C	C:101 T:976	0.0938
